# Supplementary material
Source: PubMed Central journal article supplement (PMC3217408)
Supplement: supp_blood-2011-03-341123_Document1.pdf [file supp_blood-2011-03-341123_Document1.pdf]

**Figure S1. Schematic diagram of PU/ER(T) bone marrow chimera mice generation**

**Figure S2. Detection of Y chromosome by Southern hybridization in sex mismatched FLC transplanted female PU/ER(T) bone marrow chimera mice**

# Figure S1

Fetal liver cells from donors, sex and genotype determined

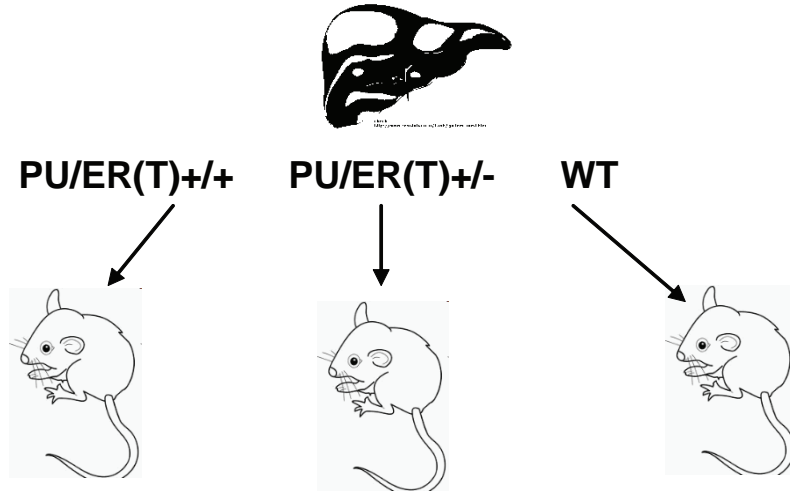

**Day 0: Irradiation, FLC transplantation, 1<sup>st</sup> Tamoxifen pellet**

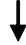

**Day 22: 2<sup>nd</sup> Tamoxifen pellet**

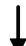

**Day 30: Intratracheal Clodronate, in order to eliminate recipient residential alveolar macrophages**

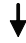

**Day 46-54: No further Tamoxifen, which allows clearance of circulating Tamoxifen, resulting in functionally inactive PU.1**

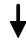

**Day 55: LPS challenge, Analysis**

**B**

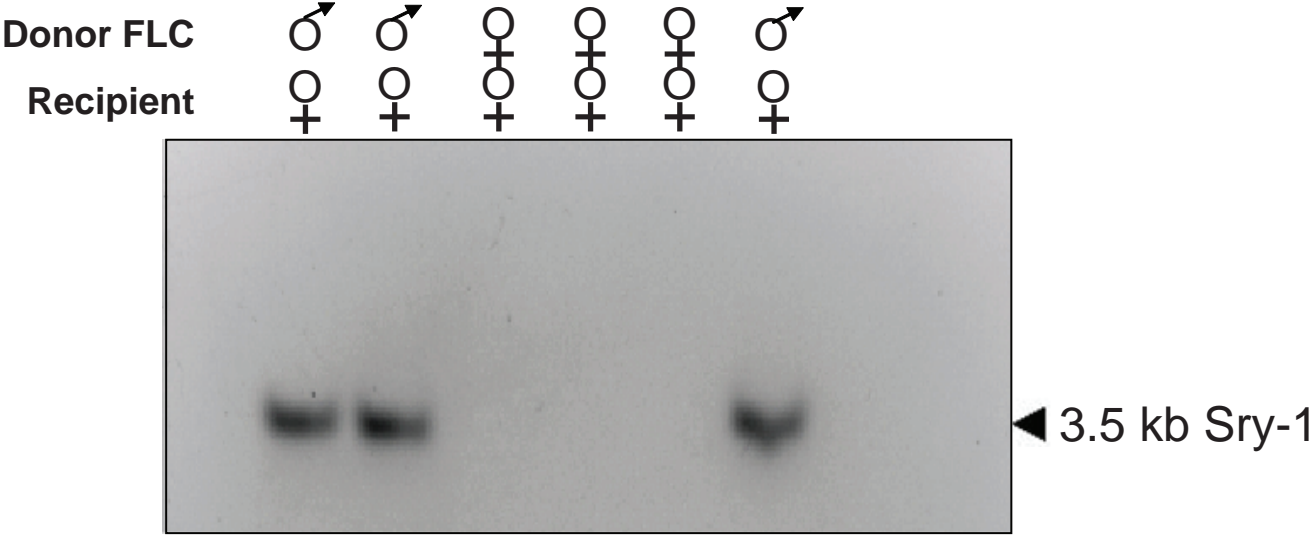

Figure S2
